# Supplementary material for: EEG and fNIRS Evidence for Brain Responses to Three Tannins: Implications for Astringency Surface Sub-quality in Red Wine
Source: Research Square preprint supplement (doi:10.21203/rs.3.rs-8690900/v1), 2026-02-02
Supplement: Supplementary file 1 [file ebbefd5eaaacc9a5ae6cc180.xlsx]

## Sheet: Table S1
Table S1. Significant analyses were performed for the three types of astringency surface sub-quality responses across each channel using water as a baseline. The data were presented as the mean ± SEM (n = 11)
		TA		GT		WT
	Channel	Mean	SEM	Mean	SEM	Mean	SEM	P
OFC	4	6.99e-05	0.000375	-0.000427	0.000183	-0.000644	0.000176	0.16
	11	0.00106	0.00093	0.000155	0.000425	3.47e-05	0.000194	0.43
	13	0.000265	8.5e-05	7.78e-05	9.91e-05	-1.39e-05	7.51e-05	0.09
	19	4.66e-05	8.26e-05	-6.81e-05	0.000111	-1.86e-05	0.00011	0.73
dmPFC	8	-2.07e-07	4.41e-05	-3.19e-05	7.54e-05	2.68e-05	7.54e-05	0.82
	9	0.000195	0.00011	9.14e-05	0.000142	0.000197	0.000164	0.83
	10	9.38e-06	4.25e-05	-9.87e-05	6.7e-05	-1.73e-05	5.68e-05	0.38
dlPFC	2	0.000192	0.000167	2.8e-05	0.000166	1.6e-06	0.000153	0.67
	5	6.86e-05	8.22e-05	-4.07e-05	5.02e-05	-3.05e-05	4.99e-05	0.41
	15	3.95e-05	5.96e-05	-6.85e-05	5.32e-05	2.27e-05	5.1e-05	0.34
	17	-2.45e-05	4.46e-05	-0.000109	8.37e-05	-2.31e-05	0.000128	0.75
vmPFC	6	0.000208	0.000129	9.25e-05	8.43e-05	0.000798	0.000287	0.03
	7	-2.78e-06	6.12e-05	-6.44e-05	7.45e-05	1.44e-05	8.24e-05	0.73
	12	0.000395	0.00233	0.00217	0.00396	-0.00183	0.000166	0.57
	14	0.000113	0.0001	-9.89e-05	5.23e-05	6.24e-05	7.36e-05	0.15
	16	-0.00102	0.000301	0.00149	0.00297	-0.000471	0.000678	0.58
vlPFC	1	-0.000108	0.000113	-0.000226	9.82e-05	-2.33e-05	0.000123	0.45
	3	-5.68e-05	8.4e-05	0.000195	0.000249	7.47e-05	0.000185	0.63
	18	0.000189	0.000521	0.000315	0.000435	0.00027	0.000479	0.98
	20	0.000285	0.000299	-0.000149	0.000102	0.000218	0.000233	0.36

## Sheet: Table S2 
Table S2.Molecular docking results of tannin interactions with PAA under different linkage types
NO.	Molecular Formula[M]	Structure	Binding Energy（kcal/mol）	Hydrophobic Interaction						Hydrogen Bonding								π-Cation Interaction							π-Stacking
DP1	[C15H14O6]		-7.2	Index	Residue	AA	Distance	Ligand Atom	Protein Atom	Index	Residue	AA	Distance H-A	Distance D-A	Donor Angle	Donor Atom	Acceptor Atom	Index	Residue	AA	Distance	Offset	Ligand Group	Ligand Atoms	Index	Residue	AA	Distance	Angle	Offset	Stacking Type	Ligand Atoms
				1	57B	TRP	3.64	7	497	1	196B	ASP	3.04	3.86	145.92	21 [O3]	1584 [O3]	-	-	-	-	-	-	-	-	-	-	-	-	-	-	-
				2	161B	LEU	3.71	15	1308	2	299B	ASP	2.29	3.02	130.79	17 [O3]	2414 [O2]	-	-	-	-	-	-	-	-	-	-	-	-	-	-	-
				3	164B	LEU	3.55	5	1327	-	-	-	-	-	-	-	-	-	-	-	-	-	-	-	-	-	-	-	-	-	-	-
DP2-B(C4-C6)	[C30H26O12]		-8.4	1	161B	LEU	3.57	5	1334	1	150B	TYR	2.33	2.81	111.33	1246 [O3]	49 [O3]	-	-	-	-	-	-	-	1	58B	TRP	4.34	10.99	1.92	P	25, 26, 27, 28, 29, 30
				2	161B	LEU	3.83	44	1333	2	162B	THR	3.16	4.06	155.48	37 [O3]	1340 [O3]	-	-	-	-	-	-	-	2	58B	TRP	3.89	10.72	0.27	P	25, 26, 27, 28, 29, 30
				3	234B	ILE	3.57	48	1920	3	162B	THR	2.04	2.84	138.67	21 [O3]	1340 [O3]	-	-	-	-	-	-	-	-	-	-	-	-	-	-	-
				-	-	-	-	-	-	4	299B	ASP	2.04	2.89	149.63	41 [O3]	2440 [O2]	-	-	-	-	-	-	-	-	-	-	-	-	-	-	-
DP2-B(C4-C8)	[C30H26O12]		-8.1	1	150B	TYR	3.6	31	1244	1	58B	TRP	2.45	3.27	142.32	49 [O3]	527 [O2]	-	-	-	-	-	-	-	-	-	-	-	-	-	-	-
				2	161B	LEU	3.72	5	1334	2	58B	TRP	2.97	3.93	174.83	47 [O3]	527 [O2]	-	-	-	-	-	-	-	-	-	-	-	-	-	-	-
				3	161B	LEU	3.74	28	1333	3	62B	GLN	2.57	3.46	150.43	578 [Nam]	49 [O3]	-	-	-	-	-	-	-	-	-	-	-	-	-	-	-
				4	162B	THR	3.83	46	1341	4	162B	THR	2.23	3.01	140.3	37 [O3]	1340 [O3]	-	-	-	-	-	-	-	-	-	-	-	-	-	-	-
				5	164B	LEU	3.21	42	1353	5	162B	THR	2.34	2.71	101.64	33 [O3]	1340 [O3]	-	-	-	-	-	-	-	-	-	-	-	-	-	-	-
				6	304B	HIS	3.65	17	2477	6	196B	ASP	3.3	4.03	132.99	51 [O3]	1611 [O2]	-	-	-	-	-	-	-	-	-	-	-	-	-	-	-
				-	-	-	-	-	-	7	197B	ALA	3.47	4.09	122.68	1612 [Nam]	51 [O3]	-	-	-	-	-	-	-	-	-	-	-	-	-	-	-
				-	-	-	-	-	-	8	299B	ASP	2.81	3.71	154.26	39 [O3]	2440 [O2]	-	-	-	-	-	-	-	-	-	-	-	-	-	-	-
				-	-	-	-	-	-	9	304B	HIS	3	3.84	145.85	21 [O3]	2476 [O2]	-	-	-	-	-	-	-	-	-	-	-	-	-	-	-
DP2-A	[C30H26O12]		-8.6	1	57B	TRP	3.83	26	521	1	58B	TRP	3.29	3.77	112.77	36 [O3]	531 [N2]	-	-	-	-	-	-	-	1	61B	TYR	4.95	73.49	1.62	T	22, 23, 24, 25, 26, 27
				2	57B	TRP	3.83	27	522	2	150B	TYR	3.34	3.91	119.89	38 [O3]	1245 [O3]	-	-	-	-	-	-	-	-	-	-	-	-	-	-	-
				3	61B	TYR	3.88	26	561	3	194B	ARG	2.77	3.62	144.21	1593 [Ng+]	30 [O3]	-	-	-	-	-	-	-	-	-	-	-	-	-	-	-
				4	161B	LEU	3.65	11	1332	4	194B	ARG	2.84	3.67	141.89	1594 [Ng+]	30 [O3]	-	-	-	-	-	-	-	-	-	-	-	-	-	-	-
				5	304B	HIS	3.97	41	2476	5	298B	HIS	2.49	3.39	153.76	30 [O3]	2431 [N2]	-	-	-	-	-	-	-	-	-	-	-	-	-	-	-
				-	-	-	-	-	-	6	299B	ASP	2.71	3.18	111.88	2438 [O3]	32 [O3]	-	-	-	-	-	-	-	-	-	-	-	-	-	-	-
				-	-	-	-	-	-	7	299B	ASP	2.25	3.18	168.48	32 [O3]	2438 [O3]	-	-	-	-	-	-	-	-	-	-	-	-	-	-	-
				-	-	-	-	-	-	8	304B	HIS	2.47	3.13	125.16	46 [O3]	2475 [O2]	-	-	-	-	-	-	-	-	-	-	-	-	-	-	-
DP3-B(C4-C6)	[C45H38O18]		-9.4	1	150B	TYR	3.54	29	1270	1	147B	ILE	2.62	3.08	109.25	31 [O3]	1239 [O2]	-	-	-	-	-	-	-	1	58B	TRP	3.87	0.66	1.45	P	69, 70, 71, 72, 73, 74
				2	161B	LEU	3.88	43	1360	2	150B	TYR	2.23	2.72	111.29	1272 [O3]	63 [O3]	-	-	-	-	-	-	-	2	58B	TRP	3.69	0.44	0.85	P	69, 70, 71, 72, 73, 74
				3	161B	LEU	3.74	58	1359	3	150B	TYR	2.07	2.72	121.98	63 [O3]	1272 [O3]	-	-	-	-	-	-	-	-	-	-	-	-	-	-	-
				4	234B	ILE	3.68	62	1946	4	162B	THR	1.96	2.81	145.62	39 [O3]	1366 [O3]	-	-	-	-	-	-	-	-	-	-	-	-	-	-	-
				-	-	-	-	-	-	5	162B	THR	3.58	3.96	105.87	1366 [O3]	31 [O3]	-	-	-	-	-	-	-	-	-	-	-	-	-	-	-
				-	-	-	-	-	-	6	162B	THR	2.78	3.68	152.83	1361 [Nam]	33 [O3]	-	-	-	-	-	-	-	-	-	-	-	-	-	-	-
				-	-	-	-	-	-	7	232B	GLU	2.21	2.77	117.02	55 [O3]	1931 [O3]	-	-	-	-	-	-	-	-	-	-	-	-	-	-	-
DP3-B(C4-C8)	[C45H38O18]		-8.4	1	58B	TRP	3.8	47	554	1	58B	TRP	2.43	3.12	127.29	51 [O3]	558 [N2]	-	-	-	-	-	-	-	1	58B	TRP	4.85	66.09	1.79	T	41, 42, 43, 45, 47, 48
				2	150B	TYR	3.93	30	1269	2	196B	ASP	2.33	2.84	111.97	75 [O3]	1636 [O3]	-	-	-	-	-	-	-	-	-	-	-	-	-	-	-
				3	161B	LEU	3.56	67	1360	3	232B	GLU	2.68	3.26	118.55	73 [O3]	1930 [O2]	-	-	-	-	-	-	-	-	-	-	-	-	-	-	-
				4	234B	ILE	3.57	26	1946	4	299B	ASP	3.23	3.66	110.4	2465 [O3]	39 [O3]	-	-	-	-	-	-	-	-	-	-	-	-	-	-	-
				5	304B	HIS	3.71	1	2503	5	304B	HIS	1.95	2.77	141.67	39 [O3]	2505 [N2]	-	-	-	-	-	-	-	-	-	-	-	-	-	-	-
				-	-	-	-	-	-	6	304B	HIS	3.42	3.77	103.65	37 [O3]	2502 [O2]	-	-	-	-	-	-	-	-	-	-	-	-	-	-	-
				-	-	-	-	-	-	7	305B	GLY	2.21	2.95	132.41	31 [O3]	2512 [O2]	-	-	-	-	-	-	-	-	-	-	-	-	-	-	-
DP4-B(C4-C6)	[C60H50O24]		-8.9	1	58B	TRP	3.64	71	588	1	62B	GLN	3.27	3.98	129.88	630 [Nam]	75 [O3]	-	-	-	-	-	-	-	-	-	-	-	-	-	-	-
				2	58B	TRP	3.67	72	583	2	162B	THR	2.36	3.24	150.16	73 [O3]	1390 [O2]	-	-	-	-	-	-	-	-	-	-	-	-	-	-	-
				3	161B	LEU	3.56	46	1386	3	162B	THR	2.96	3.69	134.7	63 [O3]	1392 [O3]	-	-	-	-	-	-	-	-	-	-	-	-	-	-	-
				4	299B	ASP	3.79	27	2489	4	304B	HIS	3.03	3.64	122.02	35 [O3]	2528 [O2]	-	-	-	-	-	-	-	-	-	-	-	-	-	-	-
				-	-	-	-	-	-	5	305B	GLY	2.27	2.99	129.44	2535 [Nam]	59 [O3]	-	-	-	-	-	-	-	-	-	-	-	-	-	-	-
				-	-	-	-	-	-	6	351B	ASN	2.53	3.18	123.35	2912 [Nam]	97 [O3]	-	-	-	-	-	-	-	-	-	-	-	-	-	-	-
				-	-	-	-	-	-	7	352B	ASP	3.04	3.4	102.81	2913 [Nam]	97 [O3]	-	-	-	-	-	-	-	-	-	-	-	-	-	-	-
				-	-	-	-	-	-	8	355B	ASP	3.38	3.68	100.96	101 [O3]	2943 [O2]	-	-	-	-	-	-	-	-	-	-	-	-	-	-	-
DP4-B(C4-C8)	[C60H50O24]		-8	1	150B	TYR	3.56	83	1296	1	200B	HIS	2.83	3.19	103.06	73 [O3]	1693 [N2]	1	199B	LYS	3.99	1.68	Aromatic	91, 92, 93, 94, 95, 96	-	-	-	-	-	-	-	-
				2	161B	LEU	3.68	71	1386	2	304B	HIS	3.24	3.87	123.39	37 [O3]	2531 [N2]	-	-	-	-	-	-	-	-	-	-	-	-	-	-	-
				3	161B	LEU	3.22	67	1385	3	351B	ASN	2.32	2.77	106.61	2912 [Nam]	35 [O3]	-	-	-	-	-	-	-	-	-	-	-	-	-	-	-
				4	234B	ILE	3.61	95	1971	4	355B	ASP	1.94	2.83	151.89	35 [O3]	2943 [O2]	-	-	-	-	-	-	-	-	-	-	-	-	-	-	-
				5	236B	LEU	3.93	95	1987	-	-	-	-	-	-	-	-	-	-	-	-	-	-	-	-	-	-	-	-	-	-	-
DP5-B(C4-C6)	[C75H62O30]		-8.8	1	162B	THR	3.72	7	1419	1	52B	ASN	2.36	3.2	144.31	45 [O3]	547 [O2]	-	-	-	-	-	-	-	1	58B	TRP	4.21	22.93	0.94	P	121, 122, 123, 124, 125, 126
				2	164B	LEU	3.81	101	1431	2	162B	THR	3.43	4.01	120.87	35 [O3]	1416 [O2]	-	-	-	-	-	-	-	-	-	-	-	-	-	-	-
				3	299B	ASP	3.76	83	2515	3	162B	THR	2.85	3.25	105.35	77 [O3]	1418 [O3]	-	-	-	-	-	-	-	-	-	-	-	-	-	-	-
				-	-	-	-	-	-	4	304B	HIS	3.48	4.06	120.75	79 [O3]	2557 [N2]	-	-	-	-	-	-	-	-	-	-	-	-	-	-	-
				-	-	-	-	-	-	5	304B	HIS	3.21	3.95	137.04	61 [O3]	2560 [N2]	-	-	-	-	-	-	-	-	-	-	-	-	-	-	-
				-	-	-	-	-	-	6	304B	HIS	2.5	3.15	123.42	91 [O3]	2557 [N2]	-	-	-	-	-	-	-	-	-	-	-	-	-	-	-
				-	-	-	-	-	-	7	355B	ASP	2.13	2.99	146.45	63 [O3]	2969 [O2]	-	-	-	-	-	-	-	-	-	-	-	-	-	-	-
DP5-B(C4-C8)	[C75H62O30]		-7.7	1	150B	TYR	3.86	73	1322	1	150B	TYR	3.19	3.98	140.21	77 [O3]	1324 [O3]	-	-	-	-	-	-	-	1	150B	TYR	5.32	64.59	1.97	T	1, 2, 3, 4, 5, 6
				2	150B	TYR	3.97	1	1317	2	162B	THR	3.04	3.49	109.52	105 [O3]	1418 [O3]	-	-	-	-	-	-	-	-	-	-	-	-	-	-	-
				3	236B	LEU	2.94	15	2013	3	232B	GLU	3.48	4.05	120.15	91 [O3]	1982 [O2]	-	-	-	-	-	-	-	-	-	-	-	-	-	-	-
				4	304B	HIS	3.66	113	2555	4	299B	ASP	2.53	3.08	117	95 [O3]	2517 [O3]	-	-	-	-	-	-	-	-	-	-	-	-	-	-	-
				-	-	-	-	-	-	5	305B	GLY	3.39	3.9	114.66	2561 [Nam]	117 [O3]	-	-	-	-	-	-	-	-	-	-	-	-	-	-	-
				-	-	-	-	-	-	6	305B	GLY	2.04	2.83	137.35	23 [O3]	2564 [O2]	-	-	-	-	-	-	-	-	-	-	-	-	-	-	-
				-	-	-	-	-	-	7	307B	GLY	2.44	3.21	135.67	2570 [Nam]	23 [O3]	-	-	-	-	-	-	-	-	-	-	-	-	-	-	-
				-	-	-	-	-	-	8	309B	ALA	2.43	2.92	110.16	2578 [Nam]	47 [O3]	-	-	-	-	-	-	-	-	-	-	-	-	-	-	-
				-	-	-	-	-	-	9	310B	SER	2.27	2.96	126.51	2583 [Nam]	47 [O3]	-	-	-	-	-	-	-	-	-	-	-	-	-	-	-
				-	-	-	-	-	-	10	310B	SER	3.1	3.5	106.51	45 [O3]	2588 [O3]	-	-	-	-	-	-	-	-	-	-	-	-	-	-	-

## Sheet: Table S3
Table S3.Astringency surface sub-quality training and screening results
	Cabernet Sauvignon		Merlot			Marselan
Participanta	AV	STD	AV	STD	Significance	AV	STD
P1	43.3333	2.88675	58.3333	7.63763	b	90	7
P2	45	5	53.3333	17.5594	b	90	2
P3	45	5	30	10	c	80	5
P4	40	5	60	5	b	93	5
P5	45	5	55	5	b	90	5
P6	40	5	65	5	ab	92	5
P7	38.3333	2.88675	75	10	a	98.3333	2.88675
P8	43.3333	5.7735	60	5	b	91	5
P9	45	5	65	5	ab	94	5
P10	41.6667	2.88675	55	5	b	89	5
P11	43.3333	10.4083	60	15	b	90	10
P12	46.6667	2.88675	60	5	b	95	5
P13	41.6667	2.88675	60	5	b	92	5
P14	40	0	55	5	b	90	5
P15	41.6667	10.4083	65	5	ab	93	5
P16	43.3333	2.88675	60	5	b	91	5						t
P value	P＞0.05		P＜0.05			P＞0.05
a: Exclusion criteria were defined as: sensory scoring standard deviation greater than 10, participants 2, 14, and 15 were excluded. or a one-way ANOVA indicating a significant difference from the majority of participants, participants 3 and 7 were excluded.
