# Supplementary material for: EEG and fNIRS Evidence for Brain Responses to Three Tannins: Implications for Astringency Surface Sub-quality in Red Wine
Source: Research Square preprint supplement (doi:10.21203/rs.3.rs-8690900/v1), 2026-02-02
Supplement: Supplementary file 2 [file ecbcf2776616e9821ca80143.docx]

# EEG and fNIRS Evidence for Brain Responses to Three Tannins: Implications for Astringency Surface Sub-quality in Red Wine

Baohui Shiab, Liya Ac, Ziyu Weiab, Imre Blankd, Linna Songab, Bo Zhangab,

Yuan Liucd* and Wen Maab*

*a College of Enology & Horticulture, Ningxia University, 750021, Yinchuan, Ningxia, China*

*b Research Center of Grape and Wine, Ministry of Education, 750021, Yinchuan, Ningxia, China*

*c Department of Food Science & Technology, School of Agriculture & Biology, Shanghai Jiao Tong University, Shanghai 200240, China*

*d School of Food Science and Engineering, Ningxia University, 750021, Yinchuan, Ningxia, China*

**Corresponding authors:*

*Yuan Liu − Department of Food Science & Technology, School of Agriculture & Biology, Shanghai Jiao Tong University, Shanghai 200240, China; School of Food Science and Engineering, Ningxia University, 750021, Yinchuan, Ningxia, China*

*orcid.org/0000-0003-1420- 0276; Phone: +86-18321615886; Email: y_liu@ sjtu.edu.c*

*Wen Ma −College of Enology & Horticulture, Ningxia University, Research Center of Grape and Wine, Ministry of Education, 750021, Yinchuan, Ningxia, China.*

*Phone: +86-18295595376; E-mail address: mawen@nxu.edu.cn (W. Ma)*


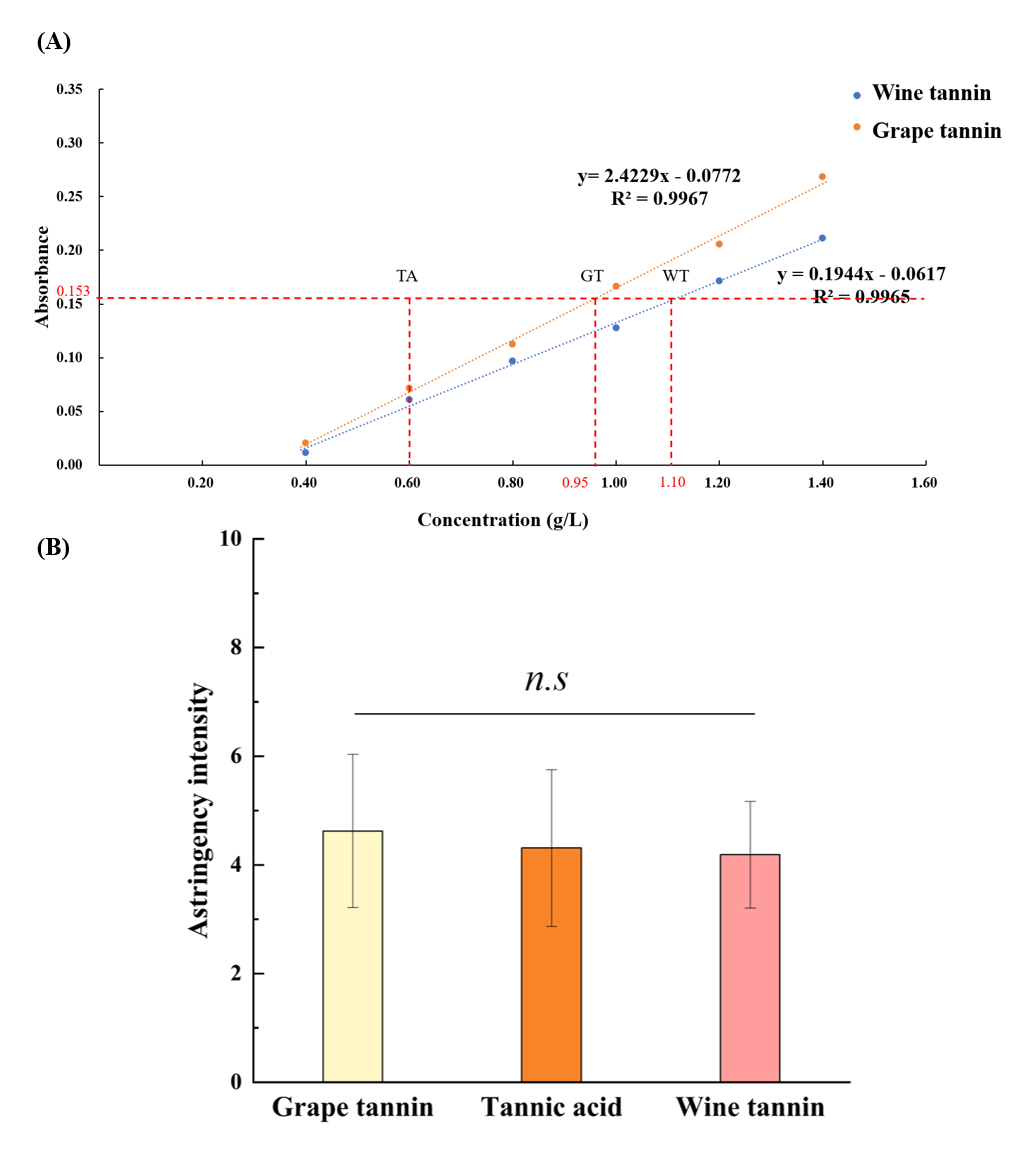


**Figure S1.** Determination of iso-intensity astringency surface sub-quality solutions. (A) Standard curves of absorbance values for various concentrations of grape tannin and wine tannin. The concentrations of grape tannin and wine tannin were determined using 0.6 g/L tannic acid as a reference. (B) Astringency intensity scores of the solutions. Data are presented as the mean ± SEM (n = 5), (*p* > 0.05).


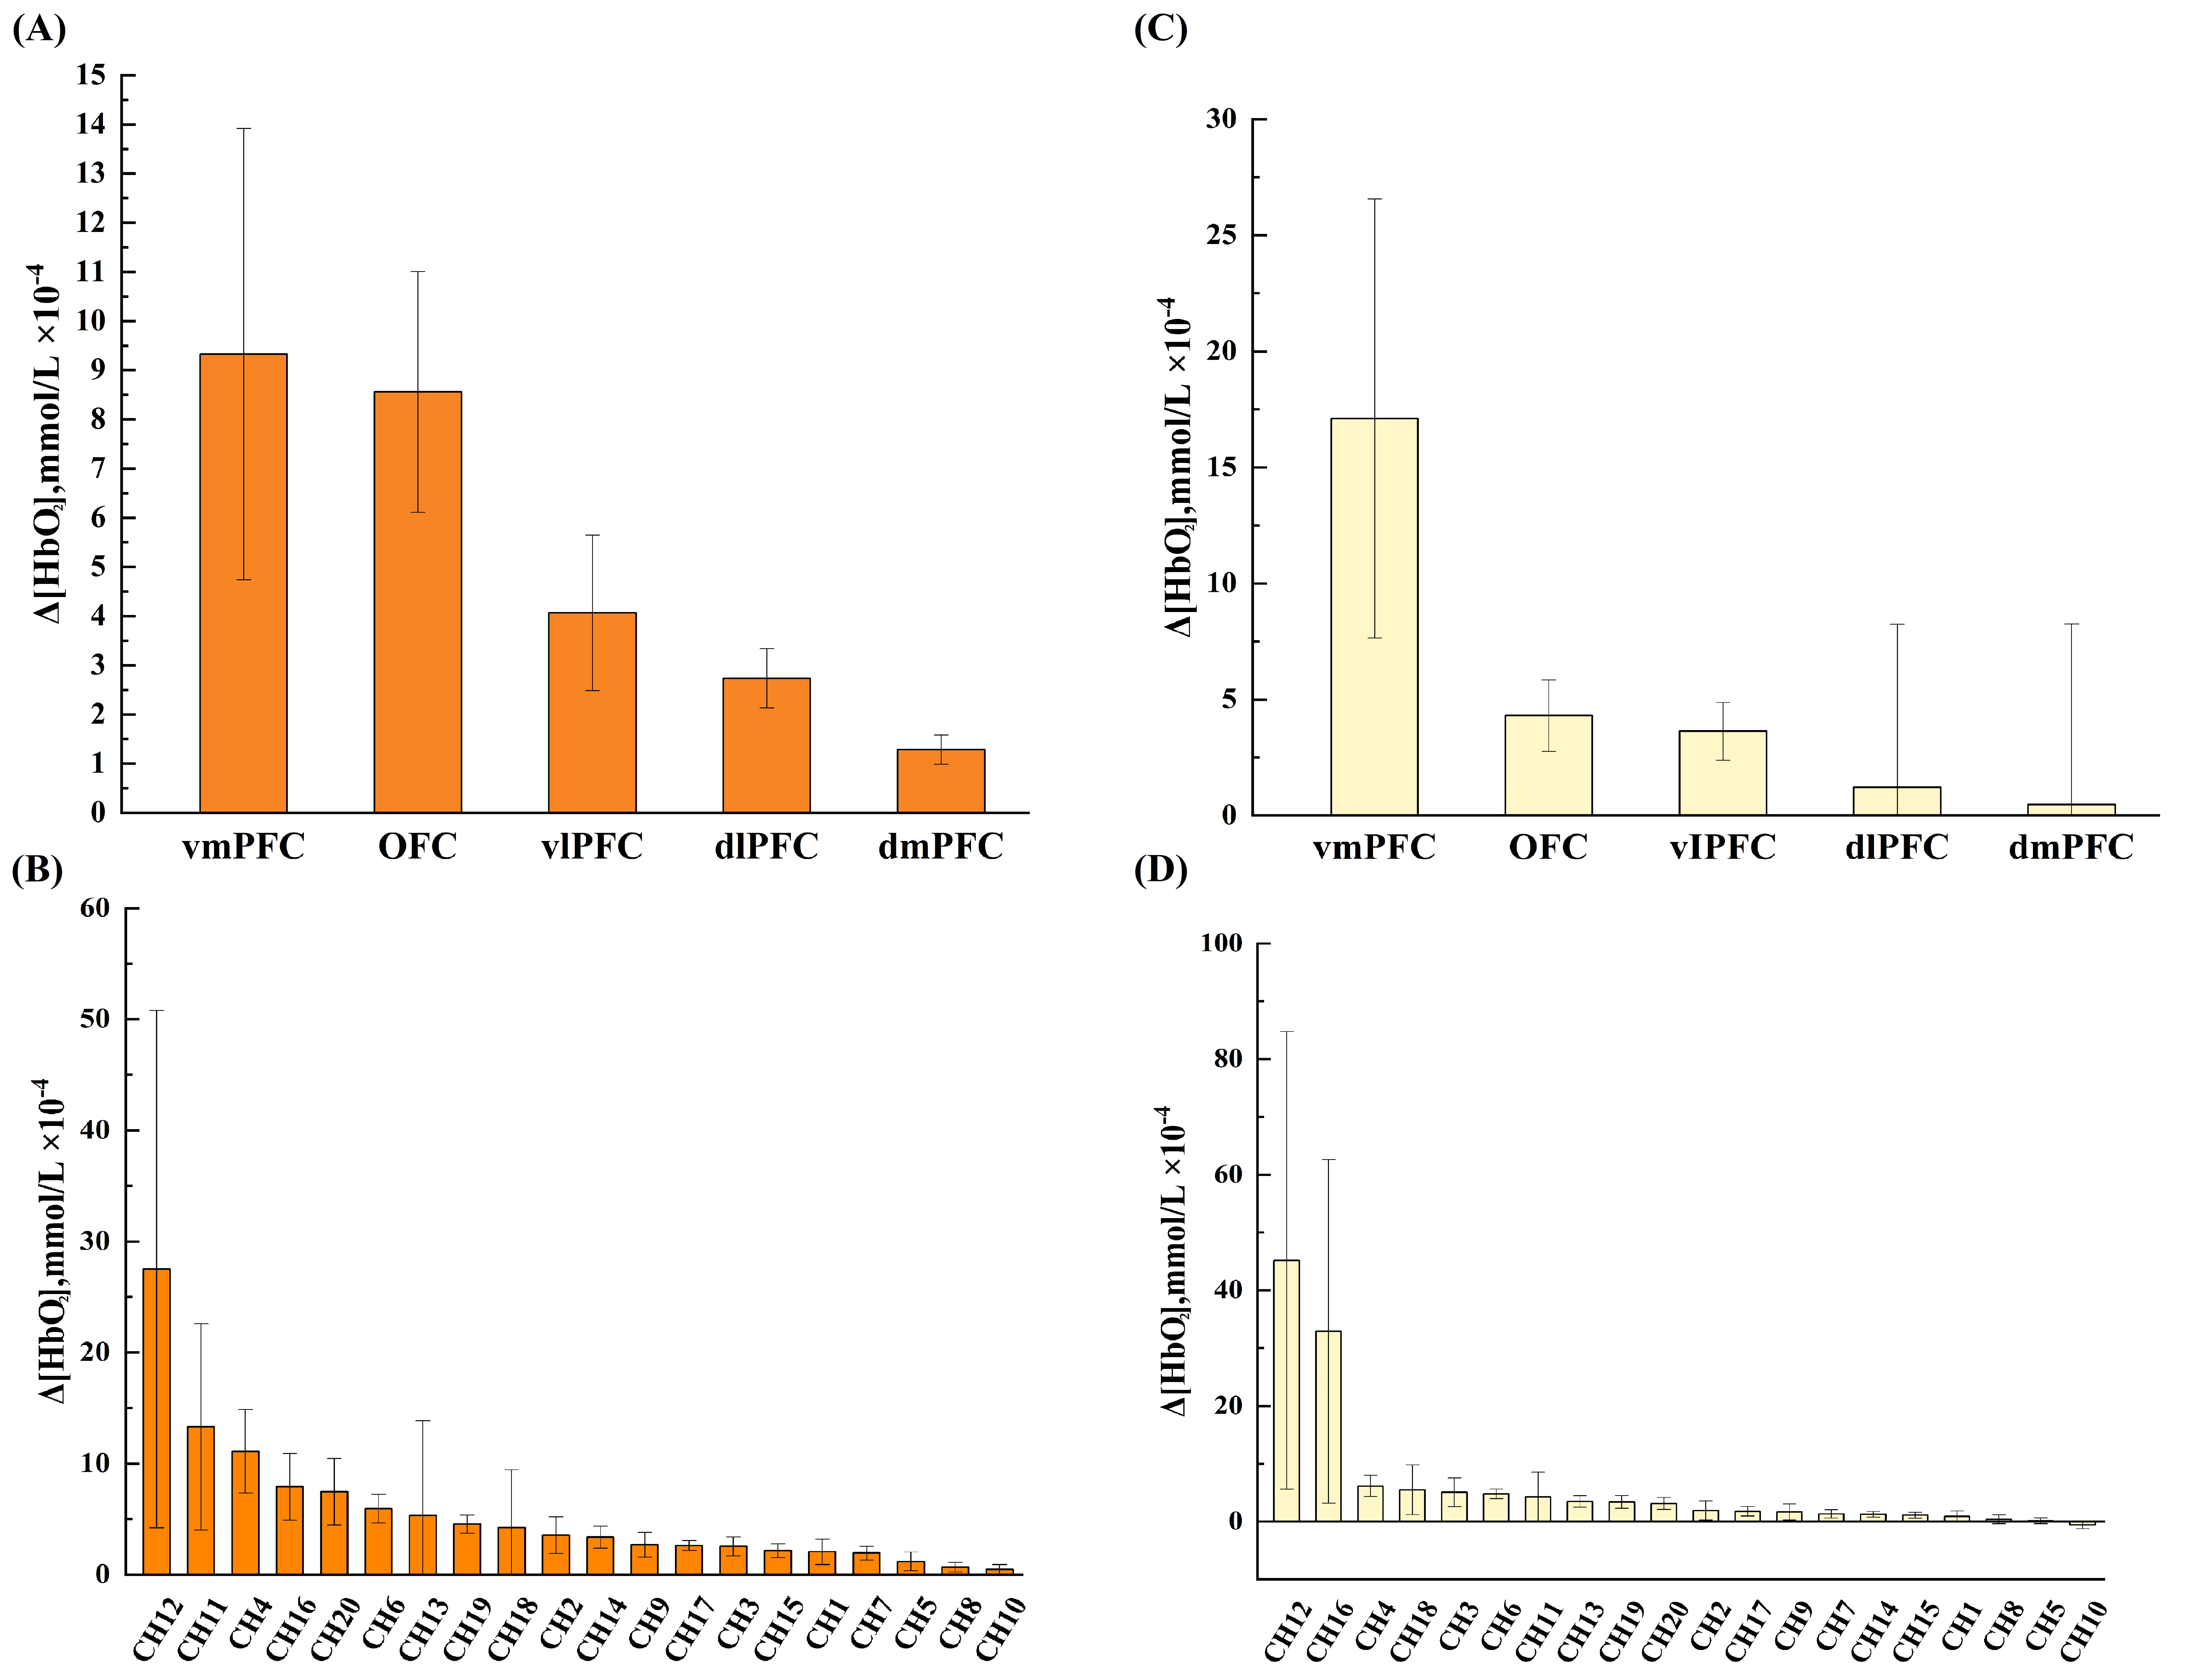


**Figure S2.** (A) Maximum change in HbO2 across various prefrontal regions induced by tannic acid. Data are presented as the mean ± SEM (n = 11), (*p* > 0.05). (B) Maximum change in HbO2 across 20 channels induced by tannic acid. Data are presented as the mean ± SEM (n = 11), (*p* > 0.05). (C) Maximum change in HbO2 across various prefrontal regions induced by grape tannin. Data are presented as the mean ± SEM (n = 11), (*p* > 0.05). (D) Maximum change in HbO2 across 20 channels induced by grape tannin. Data are presented as the mean ± SEM (n = 11), (*p* > 0.05).


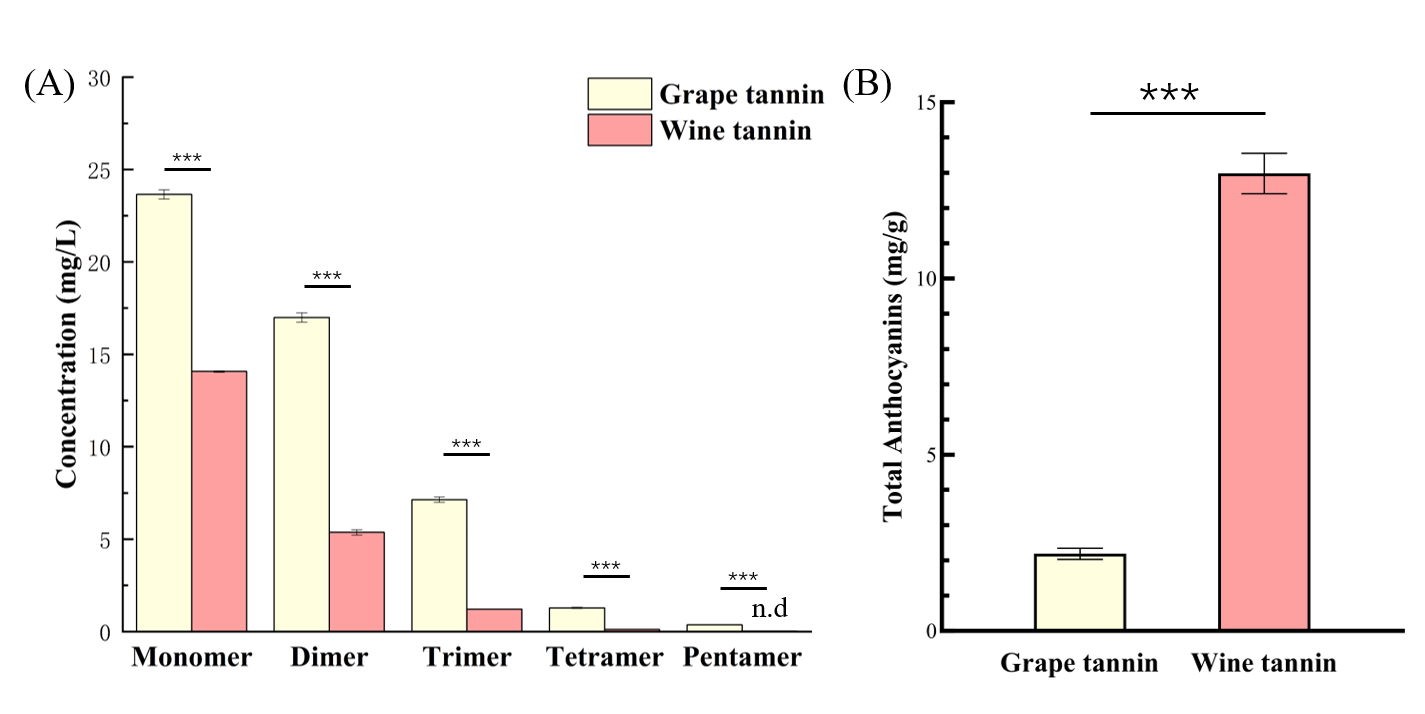


**Figure S3.** Chemical composition analysis. (A) Content of tannin oligomeric molecules in grape and wine tannin samples. (*p* < 0.001) (B) Total anthocyanins of grape and wine tannin extracts. (*p* < 0.001)

**Video S1.** The changes in the oxygenated hemoglobin response in the prefrontal region during the task performance of a participant with wine tannin
